# Supplementary material
Source: publisher figshare collection journal article supplement (https://acs.figshare.com/ndownloader/files/18064853)
Supplement: Supplementary file 1 [file 18064853]

## Sheet: Peptides_Summary-Result
Peptide Sequence	Precursor Mz	Protein Accession	Precursor Charge	Best Retention Time	Isotope Dot Product	Library Dot Product	Transition Count	Treated_bio1 Area	Treated_bio2 Area	Treated_bio3 Area	Ctrl_bio1 Area	Ctrl_bio2 Area	Ctrl_bio3 Area
IQLLAPVIAHR	410.928	sp|P63383|UVRA_STAAN	3	20.2	#N/A	0.952	5	105783	95435	119948	169534	207938	128855
LTGVLYVLDEPSIGLHQR	670.705	sp|P63383|UVRA_STAAN	3	43.5	#N/A	0.9715	5	243105	137137	161846	276117	233513	307906
STVATVTEIYDYIR	815.92	sp|P63383|UVRA_STAAN	2	49.02	#N/A	0.8808	5	231679	229246	243063	380670	324357	373669
EFSDEYVSYAIK	725.84	sp|P63645|ASSY_STAAN	2	25.15	#N/A	0.8795	5	476410	537141	451360	1531738	1834951	1570930
HNIPVSINHDSPYSIDQNLWGR	854.754	sp|P63645|ASSY_STAAN	3	27.71	#N/A	0.9037	5	2518666	1867810	1886566	8660729	10358346	7931710
TYELDDLILTLNALAGK	932.009	sp|P63645|ASSY_STAAN	2	73.73	#N/A	0.7616	5	609080	672556	521444	1823644	2191183	2050869
SKYLIATTAAK	583.843	sp|P66726|RPOZ_STAAN	2	7.22	#N/A	0.9081	4	92041	64167	84043	133587	120049	149658
EIDEQPETELLSEYHSFKPVGR	651.571	sp|P66726|RPOZ_STAAN	4	34.57	#N/A	0.9627	5	4369005	3467230	3826023	5316627	5525422	5298286
AREIDEQPETELLSEYHSFKPVGR	708.356	sp|P66726|RPOZ_STAAN	4	26.98	#N/A	0.9318	5	4774477	3040083	4190471	5429741	5345173	6327546
IDLPPFTLVGATTR	750.925	sp|P66758|RUVB_STAAN	2	52.45	#N/A	0.8049	5	436452	449574	441178	593123	672271	690596
ITIEDVYEPFLIQK	854.464	sp|P66758|RUVB_STAAN	2	57.02	#N/A	0.8128	4	94424	67519	88927	130844	136895	114850
VLLTGPSK	407.755	sp|P99067|G3P2_STAAN	2	7.65	#N/A	0.983	5	475974	498580	436933	1006204	1320314	716876
EVLPELEGK	507.279	sp|P99067|G3P2_STAAN	2	13.56	#N/A	0.8903	5	686110	990091	824519	1703779	1558644	1530652
YNLKVEPIENGLQVGDHK	685.029	sp|P99067|G3P2_STAAN	3	19.3	#N/A	0.9678	5	344695	250887	289097	656307	552824	540128
VVDVAEQIGALLTSK	771.941	sp|P99067|G3P2_STAAN	2	61.29	#N/A	0.8577	5	6207004	5859150	5363604	11718934	11640170	10644862
VLNNQFGIVNGLMTTVHAITNDQK	876.459	sp|P99067|G3P2_STAAN	3	53.7	#N/A	0.8583	5	1296229	1102645	1019280	2072707	2498844	1927496
TLAYLAELSK	554.816	sp|P99136|G3P1_STAAN	2	25.94	#N/A	0.885	5	16640487	19635125	19320172	15844797	16331166	16858229
VLISAPATGDLK	592.848	sp|P99136|G3P1_STAAN	2	15.39	#N/A	0.8832	5	15389063	16107542	19412501	15486175	15489621	13662055
AAAENIIPNSTGAAK	714.378	sp|P99136|G3P1_STAAN	2	8.73	#N/A	0.8767	4	7582693	9563473	9208222	8535638	7126764	7066374
HFAEELLNGYK	660.833	sp|Q7A551|Y1532_STAAN	2	16.85	#N/A	0.8301	5	231615	546430	386434	287563	237594	269164
DVETRLEFGSPK	689.354	sp|Q7A551|Y1532_STAAN	2	11.13	#N/A	0.8613	5	6681950	5014043	5694400	5897955	6473913	6853250
EVATNAGVKDVETR	744.886	sp|Q7A551|Y1532_STAAN	2	6.74	#N/A	0.9028	5	673299	545314	352623	579550	576685	473459
GQQLISSTNYINNEDLSR	1026.5	sp|Q7A781|SDRC_STAAN	2	20.99	#N/A	0.8618	5	210738	439845	480818	619914	807719	498427
ETFVTNLTGYK	636.827	sp|Q7A781|SDRC_STAAN	2	20.37	#N/A	0.8822	5	344132	377905	386003	497169	619412	392890
TGGLVAISGGR	494.283	tr|A0A0H3JLY5|A0A0H3JLY5_STAAN	2	8.97	#N/A	0.9707	5	654904	766305	878129	515112	657785	536062
QSFNIPALK	509.29	tr|A0A0H3JLY5|A0A0H3JLY5_STAAN	2	20.65	#N/A	0.9379	5	582738	580440	756982	528003	546218	535855
SHGTVSIYDALR	659.841	tr|A0A0H3JLY5|A0A0H3JLY5_STAAN	2	13.35	#N/A	0.9074	4	1252163	1313989	1556065	868547	1012840	1179739
AVHDLGYAQVNDIR	524.271	tr|A0A0H3JPL0|A0A0H3JPL0_STAAN	3	10.23	#N/A	0.9552	5	744302	633378	617284	1164511	1419219	1261324
VHNIITTLSEK	627.856	tr|A0A0H3JPL0|A0A0H3JPL0_STAAN	2	9.85	#N/A	0.8503	5	56208	112059	84198	175898	120988	99569
LFANTVIEEYSYK	788.898	tr|A0A0H3JPL0|A0A0H3JPL0_STAAN	2	35.16	#N/A	0.8653	4	324709	426586	335482	697350	724900	833691
GISDMTDYFVVTHGNNER	1027.97	tr|A0A0H3JQ95|A0A0H3JQ95_STAAN	2	29.89	#N/A	0.96	5	500525	376413	527098	726438	650139	605311
MNSQELLAIAVDAIDNK	922.975	tr|A0A0H3JQ95|A0A0H3JQ95_STAAN	2	72.24	#N/A	0.854	4	33917	24776	21464	34890	39118	24281
FEELYNEASQYVDELAER	1103	tr|A0A0H3JR75|A0A0H3JR75_STAAN	2	59.73	#N/A	0.8518	5	15698135	11846745	14029625	7225886	7221798	7561225
GPNFFSLHVK	382.542	tr|A0A0H3JR75|A0A0H3JR75_STAAN	3	17.47	#N/A	0.9515	5	1656288	1063992	1325596	536297	447871	547080
ELNQQVANWTVAYTK	882.949	tr|A0A0H3JR75|A0A0H3JR75_STAAN	2	27.95	#N/A	0.7978	5	4574141	3808433	4678381	2098032	2073566	2089147
VPTLDEILER	592.83	tr|A0A0H3JTK7|A0A0H3JTK7_STAAN	2	38.18	#N/A	0.9567	5	4705006	7414033	10582674	3105525	2571159	3478531
EQTNQIANKPQAIQWHTNLTNER	684.347	tr|A0A0H3JTK7|A0A0H3JTK7_STAAN	4	10.96	#N/A	0.9299	5	469585	806714	973821	208896	220314	263147
YGPNANYYIETK	716.841	tr|A0A0H3JTK7|A0A0H3JTK7_STAAN	2	11.59	#N/A	0.8546	5	391723	655840	800403	238369	174739	231182
DLGFIVHPYTVNEK	816.425	tr|A0A0H3JTK7|A0A0H3JTK7_STAAN	2	28.79	#N/A	0.8165	5	2169215	2801273	4118920	1048467	1049057	1191683

## Sheet: Proteins_Summary-Result
Accession	Description	PepSeq. Num.	Peptide Sequences	Treated_bio1 Intensity	Treated_bio2 Intensity	Treated_bio3 Intensity	Treated Intensity	Treated cv	Ctrl_bio1 Intensity	Ctrl_bio2 Intensity	Ctrl_bio3 Intensity	Ctrl Intensity	Ctrl cv	Treated:Ctrl	Treated:Ctrl P-value
sp|P63383|UVRA_STAAN	UvrABC system protein A OS=Staphylococcus aureus (strain N315) OX=158879 GN=uvrA PE=1 SV=1	3	STVATVTEIYDYIR;LTGVLYVLDEPSIGLHQR;IQLLAPVIAHR	580567	461818	524857	522414	0.1137	826321	765808	810430	800853	0.0392	0.63	0.0148832
sp|P63645|ASSY_STAAN	Argininosuccinate synthase OS=Staphylococcus aureus (strain N315) OX=158879 GN=argG PE=3 SV=1	3	EFSDEYVSYAIK;TYELDDLILTLNALAGK;HNIPVSINHDSPYSIDQNLWGR	3604156	3077507	2859370	3.18034e+06	0.1204	12016111	14384480	11553509	1.26514e+07	0.1201	0.24	0.000135878
sp|P66726|RPOZ_STAAN	DNA-directed RNA polymerase subunit omega OS=Staphylococcus aureus (strain N315) OX=158879 GN=rpoZ PE=1 SV=1	3	AREIDEQPETELLSEYHSFKPVGR;SKYLIATTAAK;EIDEQPETELLSEYHSFKPVGR	9235523	6571480	8100537	7969180	0.1678	10879955	10990644	11775490	11215363	0.0435	0.69	0.0636756
sp|P66758|RUVB_STAAN	Holliday junction ATP-dependent DNA helicase RuvB OS=Staphylococcus aureus (strain N315) OX=158879 GN=ruvB PE=1 SV=1	2	IDLPPFTLVGATTR;ITIEDVYEPFLIQK	530876	517093	530105	526025	0.0147	723967	809166	805446	779526	0.0618	0.65	0.00617996
sp|P99067|G3P2_STAAN	Glyceraldehyde-3-phosphate dehydrogenase 2 OS=Staphylococcus aureus (strain N315) OX=158879 GN=gapA2 PE=1 SV=1	5	YNLKVEPIENGLQVGDHK;VVDVAEQIGALLTSK;VLLTGPSK;EVLPELEGK;VLNNQFGIVNGLMTTVHAITNDQK	9010012	8701353	7933433	8548266	0.0649	17157931	17570796	15360014	16696247	0.0704	0.49	0.000297349
sp|P99136|G3P1_STAAN	Glyceraldehyde-3-phosphate dehydrogenase 1 OS=Staphylococcus aureus (strain N315) OX=158879 GN=gapA1 PE=1 SV=1	3	TLAYLAELSK;AAAENIIPNSTGAAK;VLISAPATGDLK	39612243	45306140	47940895	44286426	0.0961	39866610	38947551	37586658	38800273	0.0296	1.1	0.140306
sp|Q7A551|Y1532_STAAN	Putative universal stress protein SA1532 OS=Staphylococcus aureus (strain N315) OX=158879 GN=SA1532 PE=1 SV=1	3	HFAEELLNGYK;DVETRLEFGSPK;EVATNAGVKDVETR	7586864	6105787	6433457	6.7087e+06	0.116	6765068	7288192	7595873	7.21638e+06	0.0582	0.9	0.377436
sp|Q7A781|SDRC_STAAN	Serine-aspartate repeat-containing protein C OS=Staphylococcus aureus (strain N315) OX=158879 GN=sdrC PE=1 SV=1	2	ETFVTNLTGYK;GQQLISSTNYINNEDLSR	554870	817750	866821	746480	0.2247	1117083	1427131	891317	1145177	0.2349	0.63	0.0933104
tr|A0A0H3JLY5|A0A0H3JLY5_STAAN	PBP2 OS=Staphylococcus aureus (strain N315) OX=158879 GN=pbp2 PE=4 SV=1	3	QSFNIPALK;TGGLVAISGGR;SHGTVSIYDALR	2489805	2660734	3191176	2.78057e+06	0.1315	1911662	2216843	2251656	2.12672e+06	0.0879	1.26	0.0491918
tr|A0A0H3JPL0|A0A0H3JPL0_STAAN	Phosphoribosylformylglycinamidine synthase subunit PurS OS=Staphylococcus aureus (strain N315) OX=158879 GN=purS PE=3 SV=1	3	LFANTVIEEYSYK;VHNIITTLSEK;AVHDLGYAQVNDIR	1125219	1172023	1036964	1111402	0.0617	2037759	2265107	2194584	2.16582e+06	0.0537	0.5	0.000170511
tr|A0A0H3JQ95|A0A0H3JQ95_STAAN	Ribosomal silencing factor RsfS OS=Staphylococcus aureus (strain N315) OX=158879 GN=rsfS PE=3 SV=1	2	MNSQELLAIAVDAIDNK;GISDMTDYFVVTHGNNER	534442	401189	548562	494731	0.1644	761328	689257	629592	693392	0.0951	0.69	0.0547326
tr|A0A0H3JR75|A0A0H3JR75_STAAN	General stress protein 20U OS=Staphylococcus aureus (strain N315) OX=158879 GN=dps PE=3 SV=1	3	ELNQQVANWTVAYTK;FEELYNEASQYVDELAER;GPNFFSLHVK	21928564	16719170	20033602	1.95604e+07	0.1348	9860215	9743235	10197452	9933634	0.0237	1.9	0.0119625
tr|A0A0H3JTK7|A0A0H3JTK7_STAAN	Glycerophosphoryl diester phosphodiesterase OS=Staphylococcus aureus (strain N315) OX=158879 GN=glpQ PE=1 SV=1	4	DLGFIVHPYTVNEK;YGPNANYYIETK;VPTLDEILER;EQTNQIANKPQAIQWHTNLTNER	7735529	11677860	16475818	11963069	0.366	4601257	4015269	5164543	4.59369e+06	0.1251	2.51	0.041339
